# Supplementary material for: Deposition amount and dissipation kinetics of difenoconazole and propiconazole applied on banana with two commercial spray adjuvants
Source: Royal Society of Chemistry journal article supplement (doi:10.1039/c9ra02874a), 2019-01-01
Supplement: c9ra02874a1.pdf [file c9ra02874a1.pdf]

# Deposition Amount and Dissipation Kinetics of Difenoconazole and Propiconazole Applied on Banana with Two Commercial Spray Adjuvants

Jin Xu, Xiaofang Long<sup>#</sup>, Shijia Ge, Mengli Li, Lingzhu Chen, Deyu Hu and Yuping Zhang\*

State Key Laboratory Breeding Base of Green Pesticide and Agricultural Bioengineering, Key Laboratory of Green Pesticide and Agricultural Bioengineering, Ministry of Education, Guizhou University, Guiyang 550025, P. R. China.

## Supporting Information

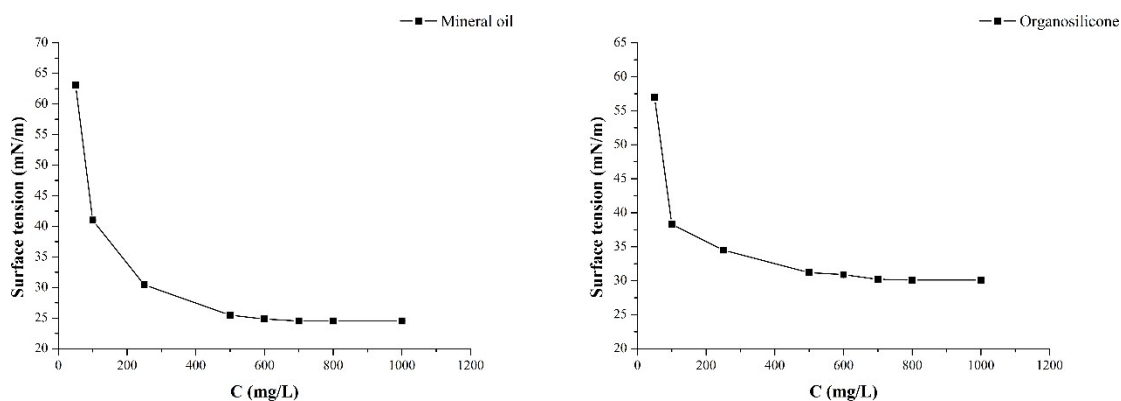

Figure 1S. Mineral oil and organosilicone concentrations and surface tension curve

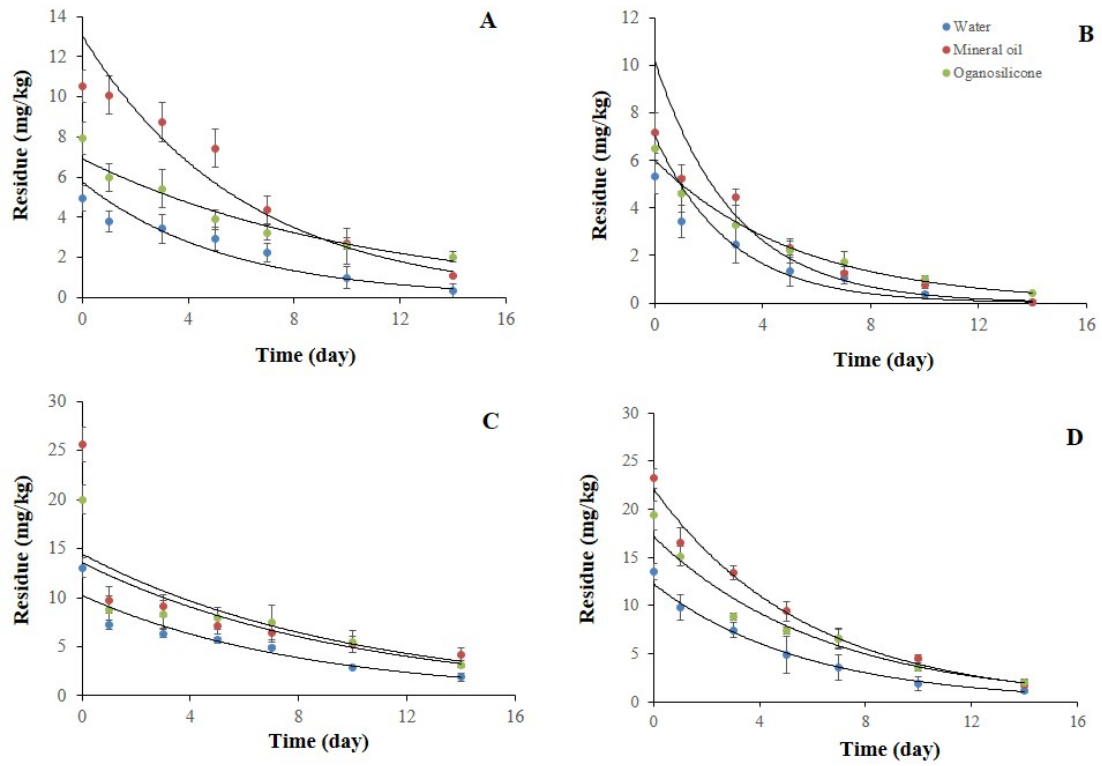

**Figure 2S.** Degradation trends of difenoconazole and propiconazole in banana leaves. A (Difenoconazole, Hainan), B (difenoconazole, Guangxi), C (propiconazole Hainan) and D (propiconazole Guangxi).
